# Supplementary material for: Lack of SARS-CoV-2 Viral RNA Detection among a Convenience Sampling of Ohio Wildlife, Companion, and Agricultural Animals, 2020–2021
Source: Animals (Basel). 2023 Aug 8;13(16):2554. doi: 10.3390/ani13162554 (PMC10451347; doi:10.3390/ani13162554)
Supplement: Supplementary file 1 [file animals-13-02554-s001.zip › animals-2494598-table S1.xlsx]

## Sheet: Sheet1
Table S1: Species and sampling dates for all samples that underwent testing for SARS-CoV-2 viral RNA.
Species	Sample ID	Date Collected
Feline - Cat	1	2020-05-26
Feline - Cat	2	2020-05-27
Feline - Cat	3	2020-05-27
Feline - Cat	4	2020-05-27
Feline - Cat	5	2020-05-27
Feline - Cat	6	2020-05-27
Feline - Cat	7	2020-05-27
Feline - Cat	8	2020-05-27
Feline - Cat	9	2020-05-27
Feline - Cat	10	2020-05-27
Feline - Cat	11	2020-05-27
Feline - Cat	12	2020-05-28
Feline - Cat	13	2020-05-28
Feline - Cat	14	2020-05-28
Feline - Cat	15	2020-05-28
Feline - Cat	16	2020-05-28
Feline - Cat	17	2020-05-28
Feline - Cat	18	2020-05-28
Feline - Cat	19	2020-05-28
Feline - Cat	20	2020-05-28
Feline - Cat	21	2020-05-28
Feline - Cat	22	2020-05-28
Feline - Cat	23	2020-05-28
Feline - Cat	24	2020-05-28
Feline - Cat	25	2020-05-28
Feline - Cat	26	2020-05-28
Feline - Cat	27	2020-05-28
Feline - Cat	28	2020-05-28
Feline - Cat	29	2020-05-31
Feline - Cat	30	2020-05-31
Feline - Cat	31	2020-06-01
Feline - Cat	32	2020-06-01
Feline - Cat	33	2020-06-01
Feline - Cat	34	2020-06-01
Feline - Cat	35	2020-06-01
Feline - Cat	36	2020-06-01
Feline - Cat	37	2020-06-01
Feline - Cat	38	2020-06-01
Feline - Cat	39	2020-06-01
Feline - Cat	40	2020-06-01
Feline - Cat	41	2020-06-02
Feline - Cat	42	2020-06-02
Feline - Cat	43	2020-06-02
Feline - Cat	44	2020-06-02
Feline - Cat	45	2020-06-02
Feline - Cat	46	2020-06-02
Feline - Cat	47	2020-06-02
Feline - Cat	48	2020-06-02
Feline - Cat	49	2020-06-02
Feline - Cat	50	2020-06-02
Feline - Cat	51	2020-06-02
Feline - Cat	52	2020-06-03
Feline - Cat	53	2020-06-03
Feline - Cat	54	2020-06-03
Feline - Cat	55	2020-06-03
Feline - Cat	56	2020-06-04
Feline - Cat	57	2020-06-04
Feline - Cat	58	2020-06-04
Feline - Cat	59	2020-06-04
Feline - Cat	60	2020-06-04
Feline - Cat	61	2020-06-04
Feline - Cat	62	2020-06-04
Feline - Cat	63	2020-06-04
Feline - Cat	64	2020-06-04
Feline - Cat	65	2020-06-04
Feline - Cat	66	2020-06-04
Feline - Cat	67	2020-06-04
Feline - Cat	68	2020-06-04
Feline - Cat	69	2020-06-04
Feline - Cat	70	2020-06-04
Feline - Cat	71	2020-06-04
Feline - Cat	72	2020-06-04
Feline - Cat	73	2020-06-04
Feline - Cat	74	2020-06-06
Feline - Cat	75	2020-06-06
Feline - Cat	76	2020-06-07
Feline - Cat	77	2020-06-07
Feline - Cat	78	2020-06-07
Feline - Cat	79	2020-06-07
Feline - Cat	80	2020-06-07
Feline - Cat	81	2020-06-07
Feline - Cat	82	2020-06-07
Feline - Cat	83	2020-06-07
Feline - Cat	84	2020-06-08
Feline - Cat	85	2020-06-08
Feline - Cat	86	2020-06-09
Feline - Cat	87	2020-06-09
Feline - Cat	88	2020-06-09
Feline - Cat	89	2020-06-09
Feline - Cat	90	2020-06-09
Feline - Cat	91	2020-06-10
Feline - Cat	92	2020-06-11
Feline - Cat	93	2020-06-11
Feline - Cat	94	2020-06-11
Feline - Cat	95	2020-06-12
Feline - Cat	96	2020-06-12
Porcine – Pig	97	2020-06-13
Porcine – Pig	98	2020-06-13
Porcine – Pig	99	2020-06-13
Porcine – Pig	100	2020-06-13
Porcine – Pig	101	2020-06-13
Porcine – Pig	102	2020-06-13
Porcine – Pig	103	2020-06-13
Porcine – Pig	104	2020-06-13
Porcine – Pig	105	2020-06-13
Porcine – Pig	106	2020-06-13
Porcine – Pig	107	2020-06-13
Porcine – Pig	108	2020-06-13
Porcine – Pig	109	2020-06-13
Porcine – Pig	110	2020-06-13
Porcine – Pig	111	2020-06-13
Porcine – Pig	112	2020-06-13
Porcine – Pig	113	2020-06-13
Porcine – Pig	114	2020-06-13
Porcine – Pig	115	2020-06-13
Porcine – Pig	116	2020-06-13
Porcine – Pig	117	2020-06-13
Porcine – Pig	118	2020-06-13
Porcine – Pig	119	2020-06-13
Porcine – Pig	120	2020-06-13
Porcine – Pig	121	2020-06-13
Porcine – Pig	122	2020-06-13
Porcine – Pig	123	2020-06-13
Porcine – Pig	124	2020-06-13
Porcine – Pig	125	2020-06-13
Porcine – Pig	126	2020-06-13
Porcine – Pig	127	2020-06-13
Porcine – Pig	128	2020-06-13
Porcine – Pig	129	2020-06-13
Porcine – Pig	130	2020-06-13
Porcine – Pig	131	2020-06-13
Porcine – Pig	132	2020-06-13
Porcine – Pig	133	2020-06-13
Porcine – Pig	134	2020-06-13
Porcine – Pig	135	2020-06-13
Porcine – Pig	136	2020-06-13
Porcine – Pig	137	2020-06-13
Porcine – Pig	138	2020-06-13
Porcine – Pig	139	2020-06-13
Porcine – Pig	140	2020-06-13
Porcine – Pig	141	2020-06-13
Porcine – Pig	142	2020-06-13
Porcine – Pig	143	2020-06-13
Porcine – Pig	144	2020-06-13
Porcine – Pig	145	2020-06-13
Porcine – Pig	146	2020-06-13
Porcine – Pig	147	2020-06-13
Porcine – Pig	148	2020-06-13
Porcine – Pig	149	2020-06-13
Porcine – Pig	150	2020-06-13
Porcine – Pig	151	2020-06-13
Porcine – Pig	152	2020-06-13
Porcine – Pig	153	2020-06-13
Porcine – Pig	154	2020-06-13
Porcine – Pig	155	2020-06-13
Porcine – Pig	156	2020-06-13
Porcine – Pig	157	2020-06-13
Porcine – Pig	158	2020-06-13
Porcine – Pig	159	2020-06-13
Porcine – Pig	160	2020-06-13
Porcine – Pig	161	2020-06-13
Porcine – Pig	162	2020-06-13
Porcine – Pig	163	2020-06-13
Porcine – Pig	164	2020-06-13
Porcine – Pig	165	2020-06-13
Porcine – Pig	166	2020-06-13
Porcine – Pig	167	2020-06-13
Porcine – Pig	168	2020-06-13
Porcine – Pig	169	2020-06-13
Porcine – Pig	170	2020-06-13
Porcine – Pig	171	2020-06-13
Porcine – Pig	172	2020-06-13
Porcine – Pig	173	2020-06-13
Porcine – Pig	174	2020-06-13
Porcine – Pig	175	2020-06-13
Porcine – Pig	176	2020-06-13
Porcine – Pig	177	2020-06-13
Porcine – Pig	178	2020-06-13
Porcine – Pig	179	2020-06-13
Porcine – Pig	180	2020-06-13
Porcine – Pig	181	2020-06-13
Porcine – Pig	182	2020-06-13
Porcine – Pig	183	2020-06-13
Porcine – Pig	184	2020-06-13
Porcine – Pig	185	2020-06-13
Porcine – Pig	186	2020-06-13
Porcine – Pig	187	2020-06-13
Porcine – Pig	188	2020-06-13
Feline - Cat	189	2020-06-14
Feline - Cat	190	2020-06-15
Feline - Cat	191	2020-06-15
Feline - Cat	192	2020-06-15
Feline - Cat	193	2020-06-15
Feline - Cat	194	2020-06-15
Feline - Cat	195	2020-06-15
Feline - Cat	196	2020-06-15
Feline - Cat	197	2020-06-15
Feline - Cat	198	2020-06-15
Feline - Cat	199	2020-06-15
Feline - Cat	200	2020-06-16
Feline - Cat	201	2020-06-16
Feline - Cat	202	2020-06-16
Feline - Cat	203	2020-06-16
Feline - Cat	204	2020-06-16
Feline - Cat	205	2020-06-16
Feline - Cat	206	2020-06-16
Feline - Cat	207	2020-06-16
Feline - Cat	208	2020-06-16
Feline - Cat	209	2020-06-17
Feline - Cat	210	2020-06-17
Feline - Cat	211	2020-06-17
Feline - Cat	212	2020-06-18
Feline - Cat	213	2020-06-19
Feline - Cat	214	2020-06-19
Feline - Cat	215	2020-06-19
Feline - Cat	216	2020-06-20
Feline - Cat	217	2020-06-21
Feline - Cat	218	2020-06-23
Feline - Cat	219	2020-06-23
Feline - Cat	220	2020-06-23
Feline - Cat	221	2020-06-23
Feline - Cat	222	2020-06-23
Feline - Cat	223	2020-06-23
Feline - Cat	224	2020-06-23
Feline - Cat	225	2020-06-23
Feline - Cat	226	2020-06-23
Feline - Cat	227	2020-06-23
Feline - Cat	228	2020-06-23
Feline - Cat	229	2020-06-24
Feline - Cat	230	2020-06-24
Feline - Cat	231	2020-06-24
Feline - Cat	232	2020-06-25
Feline - Cat	233	2020-06-25
Feline - Cat	234	2020-06-25
Feline - Cat	235	2020-06-25
Feline - Cat	236	2020-06-25
Feline - Cat	237	2020-06-25
Feline - Cat	238	2020-06-25
Feline - Cat	239	2020-06-25
Feline - Cat	240	2020-06-25
Feline - Cat	241	2020-06-28
Feline - Cat	242	2020-06-28
Feline - Cat	243	2020-06-29
Feline - Cat	244	2020-06-29
Feline - Cat	245	2020-06-29
Feline - Cat	246	2020-06-29
Feline - Cat	247	2020-06-30
Feline - Cat	248	2020-07-01
Feline - Cat	249	2020-07-01
Feline - Cat	250	2020-07-01
Feline - Cat	251	2020-07-02
Feline - Cat	252	2020-07-02
Feline - Cat	253	2020-07-02
Feline - Cat	254	2020-07-04
Feline - Cat	255	2020-07-05
Feline - Cat	256	2020-07-05
Feline - Cat	257	2020-07-05
Feline - Cat	258	2020-07-06
Feline - Cat	259	2020-07-06
Feline - Cat	260	2020-07-10
Feline - Cat	261	2020-07-10
Big Brown Bat	262	2020-07-13
Big Brown Bat	263	2020-07-13
Big Brown Bat	264	2020-07-13
Big Brown Bat	265	2020-07-13
Big Brown Bat	266	2020-07-13
Big Brown Bat	267	2020-07-13
Big Brown Bat	268	2020-07-13
Big Brown Bat	269	2020-07-13
Feline - Cat	270	2020-07-13
Feline - Cat	271	2020-07-13
Feline - Cat	272	2020-07-13
Feline - Cat	273	2020-07-13
Raccoon	274	2020-07-13
Raccoon	275	2020-07-13
Raccoon	276	2020-07-13
Feline - Cat	277	2020-07-16
Feline - Cat	278	2020-07-16
Feline - Cat	279	2020-07-16
Feline - Cat	280	2020-07-16
Feline - Cat	281	2020-07-16
Feline - Cat	282	2020-07-19
Feline - Cat	283	2020-07-20
Feline - Cat	284	2020-07-24
Feline - Cat	285	2020-07-24
Feline - Cat	286	2020-07-24
Feline - Cat	287	2020-07-27
Feline - Cat	288	2020-07-27
Feline - Cat	289	2020-07-27
Feline - Cat	290	2020-07-27
Feline - Cat	291	2020-07-29
Feline - Cat	292	2020-07-29
Feline - Cat	293	2020-07-30
Feline - Cat	294	2020-07-30
Feline - Cat	295	2020-07-30
Feline - Cat	296	2020-07-30
Feline - Cat	297	2020-07-30
Feline - Cat	298	2020-07-30
Feline - Cat	299	2020-07-30
Feline - Cat	300	2020-08-02
Feline - Cat	301	2020-08-02
Feline - Cat	302	2020-08-02
Feline - Cat	303	2020-08-02
Feline - Cat	304	2020-08-02
Feline - Cat	305	2020-08-02
Feline - Cat	306	2020-08-02
Feline - Cat	307	2020-08-03
Feline - Cat	308	2020-08-05
Feline - Cat	309	2020-08-05
Feline - Cat	310	2020-08-11
Feline - Cat	311	2020-08-13
Feline - Cat	312	2020-08-17
Feline - Cat	313	2020-08-17
Feline - Cat	314	2020-08-18
Feline - Cat	315	2020-08-19
Feline - Cat	316	2020-08-20
Feline - Cat	317	2020-08-21
Feline - Cat	318	2020-08-21
Feline - Cat	319	2020-08-25
Feline - Cat	320	2020-08-26
Feline - Cat	321	2020-08-26
Feline - Cat	322	2020-08-26
Porcine – Pig	323	2020-08-26
Porcine – Pig	324	2020-08-26
Porcine – Pig	325	2020-08-26
Porcine – Pig	326	2020-08-26
Porcine – Pig	327	2020-08-26
Porcine – Pig	328	2020-08-26
Porcine – Pig	329	2020-08-26
Porcine – Pig	330	2020-08-26
Porcine – Pig	331	2020-08-26
Porcine – Pig	332	2020-08-26
Porcine – Pig	333	2020-08-26
Porcine – Pig	334	2020-08-26
Porcine – Pig	335	2020-08-26
Porcine – Pig	336	2020-08-26
Porcine – Pig	337	2020-08-26
Porcine – Pig	338	2020-08-26
Porcine – Pig	339	2020-08-26
Porcine – Pig	340	2020-08-26
Porcine – Pig	341	2020-08-26
Porcine – Pig	342	2020-08-26
Porcine – Pig	343	2020-08-26
Porcine – Pig	344	2020-08-26
Porcine – Pig	345	2020-08-26
Porcine – Pig	346	2020-08-26
Porcine – Pig	347	2020-08-26
Feline - Cat	348	2020-08-28
Feline - Cat	349	2020-08-28
Porcine – Pig	350	2020-08-28
Porcine – Pig	351	2020-08-28
Porcine – Pig	352	2020-08-28
Porcine – Pig	353	2020-08-28
Porcine – Pig	354	2020-08-28
Porcine – Pig	355	2020-08-28
Porcine – Pig	356	2020-08-28
Porcine – Pig	357	2020-08-28
Porcine – Pig	358	2020-08-28
Porcine – Pig	359	2020-08-28
Porcine – Pig	360	2020-08-28
Porcine – Pig	361	2020-08-28
Porcine – Pig	362	2020-08-28
Porcine – Pig	363	2020-08-28
Porcine – Pig	364	2020-08-28
Porcine – Pig	365	2020-08-28
Porcine – Pig	366	2020-08-28
Porcine – Pig	367	2020-08-28
Porcine – Pig	368	2020-08-28
Porcine – Pig	369	2020-08-28
Porcine – Pig	370	2020-08-28
Porcine – Pig	371	2020-08-28
Porcine – Pig	372	2020-08-28
Porcine – Pig	373	2020-08-28
Porcine – Pig	374	2020-08-28
Feline - Cat	375	2020-08-31
Porcine – Pig	376	2020-09-02
Porcine – Pig	377	2020-09-02
Porcine – Pig	378	2020-09-02
Porcine – Pig	379	2020-09-02
Porcine – Pig	380	2020-09-02
Porcine – Pig	381	2020-09-02
Porcine – Pig	382	2020-09-02
Porcine – Pig	383	2020-09-02
Porcine – Pig	384	2020-09-02
Porcine – Pig	385	2020-09-02
Porcine – Pig	386	2020-09-02
Porcine – Pig	387	2020-09-02
Porcine – Pig	388	2020-09-02
Porcine – Pig	389	2020-09-02
Porcine – Pig	390	2020-09-02
Porcine – Pig	391	2020-09-02
Porcine – Pig	392	2020-09-02
Porcine – Pig	393	2020-09-02
Porcine – Pig	394	2020-09-02
Porcine – Pig	395	2020-09-02
Porcine – Pig	396	2020-09-02
Porcine – Pig	397	2020-09-02
Porcine – Pig	398	2020-09-02
Porcine – Pig	399	2020-09-02
Porcine – Pig	400	2020-09-02
Porcine – Pig	401	2020-09-02
Porcine – Pig	402	2020-09-02
Porcine – Pig	403	2020-09-02
Porcine – Pig	404	2020-09-02
Porcine – Pig	405	2020-09-02
Porcine – Pig	406	2020-09-02
Porcine – Pig	407	2020-09-02
Porcine – Pig	408	2020-09-02
Porcine – Pig	409	2020-09-02
Porcine – Pig	410	2020-09-02
Porcine – Pig	411	2020-09-02
Porcine – Pig	412	2020-09-02
Porcine – Pig	413	2020-09-02
Porcine – Pig	414	2020-09-02
Porcine – Pig	415	2020-09-02
Porcine – Pig	416	2020-09-02
Porcine – Pig	417	2020-09-02
Feline - Cat	418	2020-09-04
Feline - Cat	419	2020-09-07
Feline - Cat	420	2020-09-08
Feline - Cat	421	2020-09-19
Feline - Cat	422	2020-09-21
Feline - Cat	423	2020-09-22
Feline - Cat	424	2020-09-22
Feline - Cat	425	2020-09-22
Feline - Cat	426	2020-09-22
Feline - Cat	427	2020-09-22
Feline - Cat	428	2020-09-22
Big Brown Bat	429	2020-09-23
Big Brown Bat	430	2020-09-23
Eastern Grey Squirrel	431	2020-09-23
Eastern Grey Squirrel	432	2020-09-23
Feline - Cat	433	2020-09-25
Feline - Cat	434	2020-09-25
Feline - Cat	435	2020-09-25
Feline - Cat	436	2020-09-25
Feline - Cat	437	2020-09-25
Feline - Cat	438	2020-09-25
Feline - Cat	439	2020-09-25
Feline - Cat	440	2020-09-25
Feline - Cat	441	2020-09-28
Feline - Cat	442	2020-09-28
Feline - Cat	443	2020-09-28
Feline - Cat	444	2020-09-28
Feline - Cat	445	2020-09-28
Feline - Cat	446	2020-09-28
Feline - Cat	447	2020-09-28
Feline - Cat	448	2020-09-28
Feline - Cat	449	2020-09-28
Feline - Cat	450	2020-09-28
Feline - Cat	451	2020-09-29
Feline - Cat	452	2020-09-29
Feline - Cat	453	2020-09-29
Feline - Cat	454	2020-09-29
Feline - Cat	455	2020-09-29
Feline - Cat	456	2020-09-29
Feline - Cat	457	2020-09-29
Feline - Cat	458	2020-09-29
Feline - Cat	459	2020-09-29
Feline - Cat	460	2020-09-29
Feline - Cat	461	2020-09-29
Feline - Cat	462	2020-09-29
Feline - Cat	463	2020-09-29
Feline - Cat	464	2020-10-05
Feline - Cat	465	2020-10-05
Feline - Cat	466	2020-10-05
Feline - Cat	467	2020-10-05
Feline - Cat	468	2020-10-05
Feline - Cat	469	2020-10-05
Feline - Cat	470	2020-10-12
Feline - Cat	471	2020-10-12
Feline - Cat	472	2020-10-12
Feline - Cat	473	2020-10-12
Feline - Cat	474	2020-10-12
White-tailed Deer	475	2020-10-28
White-tailed Deer	476	2020-10-28
White-tailed Deer	477	2020-10-28
White-tailed Deer	478	2020-10-28
White-tailed Deer	479	2020-10-28
White-tailed Deer	480	2020-10-28
White-tailed Deer	481	2020-10-28
White-tailed Deer	482	2020-10-28
White-tailed Deer	483	2020-10-28
White-tailed Deer	484	2020-10-28
White-tailed Deer	485	2020-10-28
White-tailed Deer	486	2020-10-28
White-tailed Deer	487	2020-10-28
White-tailed Deer	488	2020-10-28
White-tailed Deer	489	2020-10-28
White-tailed Deer	490	2020-10-28
White-tailed Deer	491	2020-10-28
White-tailed Deer	492	2020-10-28
White-tailed Deer	493	2020-10-28
White-tailed Deer	494	2020-10-28
White-tailed Deer	495	2020-10-28
White-tailed Deer	496	2020-10-28
White-tailed Deer	497	2020-10-28
White-tailed Deer	498	2020-10-28
White-tailed Deer	499	2020-10-28
White-tailed Deer	500	2020-10-28
White-tailed Deer	501	2020-10-28
White-tailed Deer	502	2020-11-02
White-tailed Deer	503	2020-11-02
White-tailed Deer	504	2020-11-02
White-tailed Deer	505	2020-11-02
White-tailed Deer	506	2020-11-02
White-tailed Deer	507	2020-11-02
White-tailed Deer	508	2020-11-02
White-tailed Deer	509	2020-11-02
White-tailed Deer	510	2020-11-02
White-tailed Deer	511	2020-11-02
White-tailed Deer	512	2020-11-02
White-tailed Deer	513	2020-11-02
White-tailed Deer	514	2020-11-02
White-tailed Deer	515	2020-11-02
White-tailed Deer	516	2020-11-02
White-tailed Deer	517	2020-11-02
White-tailed Deer	518	2020-11-02
White-tailed Deer	519	2020-11-02
White-tailed Deer	520	2020-11-02
White-tailed Deer	521	2020-11-02
White-tailed Deer	522	2020-11-02
White-tailed Deer	523	2020-11-02
White-tailed Deer	524	2020-11-12
White-tailed Deer	525	2020-11-12
White-tailed Deer	526	2020-11-12
White-tailed Deer	527	2020-11-12
White-tailed Deer	528	2020-11-12
White-tailed Deer	529	2020-11-12
White-tailed Deer	530	2020-11-12
White-tailed Deer	531	2020-11-12
Ferret	532	2020-11-13
White-tailed Deer	533	2020-11-18
White-tailed Deer	534	2020-11-18
White-tailed Deer	535	2020-11-18
White-tailed Deer	536	2020-11-18
White-tailed Deer	537	2020-11-18
White-tailed Deer	538	2020-11-18
White-tailed Deer	539	2020-11-18
White-tailed Deer	540	2020-11-18
White-tailed Deer	541	2020-11-18
White-tailed Deer	542	2020-11-18
White-tailed Deer	543	2020-11-18
White-tailed Deer	544	2020-11-18
White-tailed Deer	545	2020-11-18
White-tailed Deer	546	2020-11-18
White-tailed Deer	547	2020-11-18
White-tailed Deer	548	2020-11-18
White-tailed Deer	549	2020-11-18
White-tailed Deer	550	2020-11-18
White-tailed Deer	551	2020-11-18
Raccoon	552	2020-11-23
Raccoon	553	2020-11-23
Mink	554	2020-11-24
Mink	555	2020-11-24
Mink	556	2020-11-24
Muskrat	557	2020-11-24
Muskrat	558	2020-11-24
Muskrat	559	2020-11-24
Mink	560	2020-11-25
Muskrat	561	2020-11-25
Big Brown Bat	562	2020-11-27
Mink	563	2020-11-27
Mink	564	2020-11-27
Muskrat	565	2020-11-27
Mink	566	2020-11-28
Mink	567	2020-11-28
Mink	568	2020-11-28
Mink	569	2020-11-28
Mink	570	2020-11-28
Mink	571	2020-11-28
Mink	572	2020-11-28
Mink	573	2020-11-30
Mink	574	2020-12-04
Mink	575	2020-12-07
Mink	576	2020-12-07
Mink	577	2020-12-08
Mink	578	2020-12-08
Mink	579	2020-12-08
Mink	580	2020-12-09
Mink	581	2020-12-10
Mink	582	2020-12-10
Mink	583	2020-12-10
Mink	584	2020-12-10
Mink	585	2020-12-11
Mink	586	2020-12-12
Mink	587	2020-12-12
Muskrat	588	2020-12-12
Big Brown Bat	589	2020-12-13
Big Brown Bat	590	2020-12-13
Eastern Grey Squirrel	591	2020-12-13
Mink	592	2020-12-13
Big Brown Bat	593	2020-12-14
Big Brown Bat	594	2020-12-14
Big Brown Bat	595	2020-12-14
Mink	596	2020-12-14
Big Brown Bat	597	2020-12-15
Big Brown Bat	598	2020-12-15
Big Brown Bat	599	2020-12-15
Big Brown Bat	600	2020-12-15
Big Brown Bat	601	2020-12-15
Mink	602	2020-12-15
Mink	603	2020-12-15
Mink	604	2020-12-16
Muskrat	605	2020-12-16
Muskrat	606	2020-12-16
Mink	607	2020-12-17
Muskrat	608	2020-12-17
Beaver	609	2020-12-28
Beaver	610	2020-12-28
Beaver	611	2020-12-28
Beaver	612	2020-12-29
Big Brown Bat	613	2021-01-06
Big Brown Bat	614	2021-01-06
Big Brown Bat	615	2021-01-06
Big Brown Bat	616	2021-01-06
Big Brown Bat	617	2021-01-06
Big Brown Bat	618	2021-01-06
Mink	619	2021-01-11
Big Brown Bat	620	2021-01-12
Big Brown Bat	621	2021-01-12
Mink	622	2021-01-12
Ferret	623	2021-01-13
Ferret	624	2021-01-13
Ferret	625	2021-01-13
Ferret	626	2021-01-13
Ferret	627	2021-01-13
Mink	628	2021-01-15
Mink	629	2021-01-16
Muskrat	630	2021-01-16
Muskrat	631	2021-01-16
Mink	632	2021-01-17
Mink	633	2021-01-17
Muskrat	634	2021-01-17
Muskrat	635	2021-01-17
Mink	636	2021-01-18
Muskrat	637	2021-01-18
Muskrat	638	2021-01-18
Muskrat	639	2021-01-18
Muskrat	640	2021-01-19
Muskrat	641	2021-01-20
Muskrat	642	2021-01-20
Muskrat	643	2021-01-21
Mink	644	2021-01-22
Mink	645	2021-01-22
Mink	646	2021-01-22
Mink	647	2021-01-22
Muskrat	648	2021-01-22
Coyote	649	2021-01-23
Muskrat	650	2021-01-23
Muskrat	651	2021-01-23
Big Brown Bat	652	2021-01-24
Big Brown Bat	653	2021-01-24
Mink	654	2021-01-24
Mink	655	2021-01-24
Mink	656	2021-01-24
Mink	657	2021-01-24
Mink	658	2021-01-24
Mink	659	2021-01-24
Mink	660	2021-01-24
Mink	661	2021-01-24
Mink	662	2021-01-24
Mink	663	2021-01-24
Mink	664	2021-01-24
Mink	665	2021-01-24
Muskrat	666	2021-01-24
Muskrat	667	2021-01-25
Big Brown Bat	668	2021-01-27
Big Brown Bat	669	2021-01-27
Big Brown Bat	670	2021-01-27
Big Brown Bat	671	2021-01-27
Big Brown Bat	672	2021-01-27
Muskrat	673	2021-01-28
Muskrat	674	2021-01-29
Muskrat	675	2021-01-30
Muskrat	676	2021-01-31
Muskrat	677	2021-02-01
Muskrat	678	2021-02-01
Muskrat	679	2021-02-02
Big Brown Bat	680	2021-02-03
Eastern Cottontail Rabbit	681	2021-02-03
Muskrat	682	2021-02-03
Muskrat	683	2021-02-03
Muskrat	684	2021-02-03
Raccoon	685	2021-02-03
Silver Haired Bat	686	2021-02-03
Big Brown Bat	687	2021-02-04
Big Brown Bat	688	2021-02-10
Virginia Opossum	689	2021-02-11
Big Brown Bat	690	2021-02-17
Big Brown Bat	691	2021-02-17
Big Brown Bat	692	2021-02-24
Big Brown Bat	693	2021-02-24
Big Brown Bat	694	2021-02-24
Big Brown Bat	695	2021-02-24
Big Brown Bat	696	2021-02-24
Bonobo	697	2021-03-06
Big Brown Bat	698	2021-03-10
Big Brown Bat	699	2021-03-10
Big Brown Bat	700	2021-03-10
Big Brown Bat	701	2021-03-10
Big Brown Bat	702	2021-03-10
Big Brown Bat	703	2021-03-10
Eastern Cottontail Rabbit	704	2021-03-10
Muskrat	705	2021-03-10
Virginia Opossum	706	2021-03-10
Virginia Opossum	707	2021-03-10
Chipmunk	708	2021-03-13
Fox Squirrel	709	2021-03-13
Groundhog	710	2021-03-13
Raccoon	711	2021-03-13
Big Brown Bat	712	2021-03-17
Big Brown Bat	713	2021-03-18
Big Brown Bat	714	2021-03-18
Eastern Grey Squirrel	715	2021-03-24
Eastern Cottontail Rabbit	716	2021-03-30
Red Squirrel	717	2021-03-30
Virginia Opossum	718	2021-03-30
Fox Squirrel	719	2021-04-02
Fox Squirrel	720	2021-04-02
Fox Squirrel	721	2021-04-02
Fox Squirrel	722	2021-04-02
Eastern Cottontail Rabbit	723	2021-04-14
Eastern Cottontail Rabbit	724	2021-04-14
Eastern Cottontail Rabbit	725	2021-04-14
Eastern Cottontail Rabbit	726	2021-04-14
Eastern Cottontail Rabbit	727	2021-04-14
Eastern Cottontail Rabbit	728	2021-04-14
Eastern Cottontail Rabbit	729	2021-04-14
Eastern Cottontail Rabbit	730	2021-04-14
Eastern Cottontail Rabbit	731	2021-04-14
Eastern Cottontail Rabbit	732	2021-04-14
Eastern Grey Squirrel	733	2021-04-14
Eastern Grey Squirrel	734	2021-04-14
Eastern Grey Squirrel	735	2021-04-14
Eastern Grey Squirrel	736	2021-04-14
Eastern Grey Squirrel	737	2021-04-14
Eastern Grey Squirrel	738	2021-04-14
Otter	739	2021-04-20
Bornean orangutan	801	2021-04-30
Kinkajou	740	2021-05-01
Colobus	741	2021-05-11
Cheetah	742	2021-05-12
Langur	743	2021-05-12
Virginia Opossum	744	2021-05-19
Lemur	745	2021-05-25
Lemur	746	2021-05-25
Mink	747	2021-05-31
Tricolored Bat	748	2021-06-01
Big Brown Bat	749	2021-06-02
Big Brown Bat	750	2021-06-02
Groundhog	751	2021-06-04
Raccoon	752	2021-06-04
Raccoon	753	2021-06-04
Raccoon	754	2021-06-04
Raccoon	755	2021-06-04
Skunk	756	2021-06-04
Skunk	757	2021-06-04
Virginia Opossum	758	2021-06-04
Virginia Opossum	759	2021-06-04
Cheetah	760	2021-06-08
Capybara	761	2021-06-09
Skunk	762	2021-06-10
Skunk	763	2021-06-10
Skunk	764	2021-06-10
Skunk	765	2021-06-10
Skunk	766	2021-06-11
Skunk	767	2021-06-14
Skunk	768	2021-06-14
Skunk	769	2021-06-14
Skunk	770	2021-06-14
Skunk	771	2021-06-14
Big Brown Bat	772	2021-06-15
Groundhog	773	2021-06-23
Skunk	774	2021-06-24
Skunk	775	2021-06-24
Skunk	776	2021-06-24
Skunk	777	2021-06-24
Skunk	778	2021-06-24
Skunk	779	2021-06-28
Skunk	780	2021-06-28
Big Brown Bat	781	2021-06-29
Big Brown Bat	782	2021-06-30
Raccoon	783	2021-07-04
Canada Goose	784	2021-07-11
Fox Squirrel	785	2021-07-11
American Robin	786	2021-07-13
Big Brown Bat	787	2021-07-13
Eastern Grey Squirrel	788	2021-07-13
Skunk	789	2021-07-13
Red Bat	790	2021-07-21
Raccoon	791	2021-07-28
Red Bat	792	2021-07-28
Raccoon	793	2021-08-04
Skunk	794	2021-08-05
Skunk	795	2021-08-05
Skunk	796	2021-08-05
Skunk	797	2021-08-05
Skunk	798	2021-08-05
Mandrill	799	2021-08-09
Raccoon	800	2021-08-09
